# Supplementary material for: Pathogenic and rare deleterious variants in multiple genes suggest oligogenic inheritance in recurrent exertional rhabdomyolysis
Source: PubMed Central journal article supplement — Mol Genet Metab Rep. 2018 Aug 1;16:76–81. doi: 10.1016/j.ymgmr.2018.07.007 (PMC6072915; doi:10.1016/j.ymgmr.2018.07.007), 2018-08-01
Supplement: mmc1.pdf [file mmc1.pdf]

## Supplementary Data

### Pathogenic and rare deleterious variants in multiple genes suggest oligogenic inheritance in recurrent exertional rhabdomyolysis

Sambuughin N., Mungunsukh O., Ren M., Capacchione J.F., Horkayne-Szakaly I.,  
Chuang K., Muldoon S.M., Smith J.K., O'Connor F.G., Deuster PA.

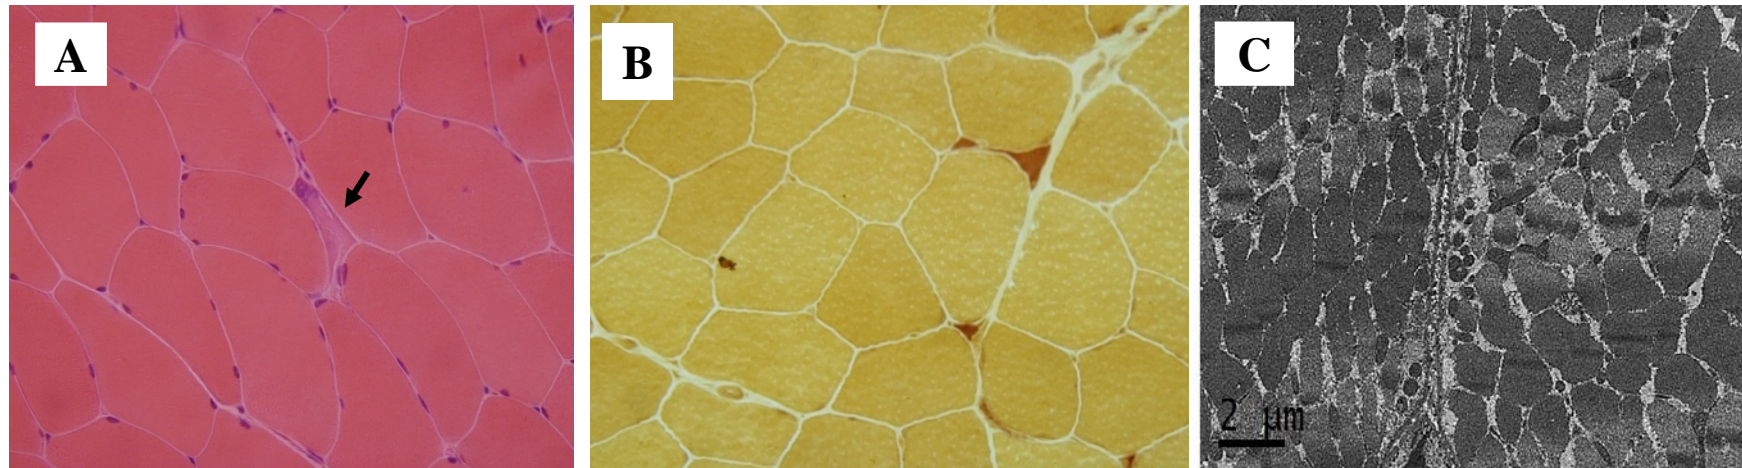

**Fig. S1.** Histopathological findings in case R410. **A.** Hematoxylin and Eosin stain shows small basophilic regenerating myofiber (an arrow). **B.** Small angular muscle fibers stain dark with non-specific esterase stain. **C.** Electron microscopy shows mitochondria in the subsarcolemmal area. No tubulofilamentous structures or paracrystalline inclusions are identified.

## Supplementary Table

| ID   | Gene    | Nucleotide change         | AA change    | Variant ID* | Freq.**      | SIFT             | PolyPhen | Mut Taster |
|------|---------|---------------------------|--------------|-------------|--------------|------------------|----------|------------|
| R279 | NDUFA10 | c2_240944654: ins_GGACA   | N288RfrTer30 | rs764415074 | 4/123136     | Loss of function |          | DC***      |
|      | PYGM    | c11_64521431: G>A         | R387C        | rs926204490 | not reported | Deleterious      | Damaging | DC         |
|      | TIMM50  | c19_39978719: C>T         | R342W        | N.A.        | 2/122822     | Deleterious      | Damaging | DC         |
| R302 | HMBS    | c11_118962147: C>T        | R175W        | rs756417575 | 6/90012      | Deleterious      | Damaging | DC         |
|      | GBE1    | c3_81635341: C>T          | D413N        | rs752711257 | 1/15481      | Deleterious      | Damaging | DC         |
|      | PHKA1   | cX_71839141: G>A          | L718F        | N.A.        | not reported | Tolerated        | Damaging | DC         |
|      | RYR1    | c19_39070725: C>T         | T4823M       | rs148540135 | 49/138558    | Tolerated        | Damaging | DC         |
| R410 | GBE1    | c3_81627124: G>A          | R524Ter      | rs137852888 | 9/120346     | Loss of function |          | DC         |
|      | PCCB    | c13_136046019: ins14del12 | G407RfsTer27 | rs397507445 | not reported | Loss of function |          | DC         |
| R462 | CACNA1S | c1_201047133: C>A         | R498L        | rs150590855 | 171/138621   | Deleterious      | Damaging | DC         |
|      | HMBS    | c11_118963136: G>A        | R225Q        | rs142459647 | 52/138575    | Deleterious      | Damaging | DC         |
|      | NDUFS8  | c11_66799622: C>T         | R2C          | rs150278938 | 467/138582   | Tolerated        | Benign   | SNP        |
|      |         | c11_67803723: A>G         | I126V        | N.A.        | 1/121677     | Deleterious      | Damaging | DC         |
| R465 | CPT2    | c1_53676715: A>T          | K457Ter      | rs756931329 | 9/123047     | Loss of function |          | DC         |
|      | ELAC2   | c17_12920410: del_A       | Q92RfsTer9   | rs748788377 | 3/123084     | Loss of function |          | DC         |
| R469 | ACADVL  | c17_7124136: C>A          | S133Y        | rs757608507 | 2/123064     | Deleterious      | Damaging | SNP        |
|      | NDUFA6  | c22_42482290: del_TTAA    | I120KfsTer44 | rs768463498 | 19/123126    | Loss of function |          | DC         |
| R470 | NUBPL   | c14_32295921: G>A         | IVS8DS       | rs751631278 | 4/122943     | Loss of function |          | DC         |
|      | OAT     | c10_126091499: G>C        | Y299Ter      | rs121965057 | 4/123094     | Loss of function |          | DC         |

\* - N.A., Not Available

\*\* - Genotype frequency from Broad Institute Database of >120,000 genomes

\*\*\* - DC, Disease Causing

**A.**

**R410:**

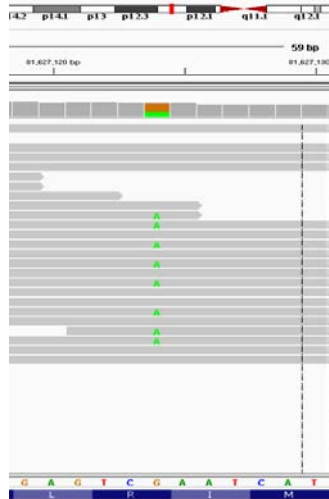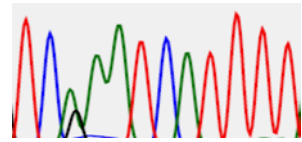

***GBE1*: R524Ter**

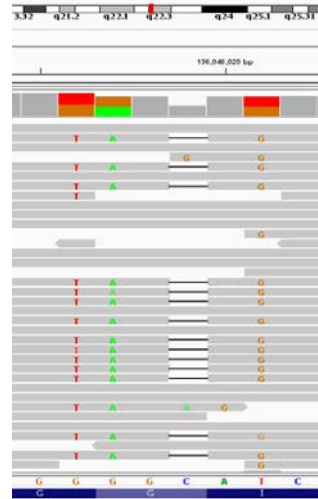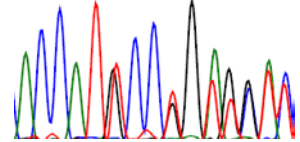

***PCCB*: G407RfrTer14**

**R465:**

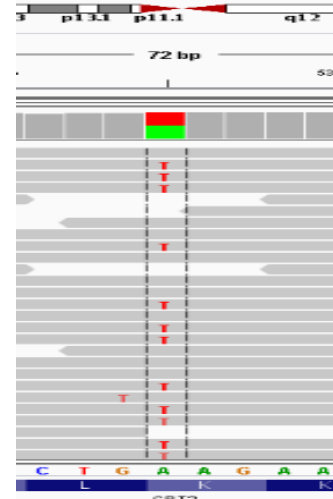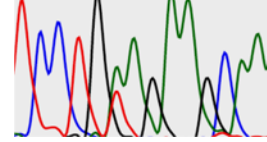

***CPT2*: K457Ter**

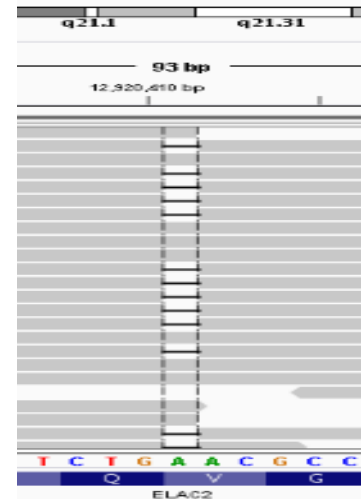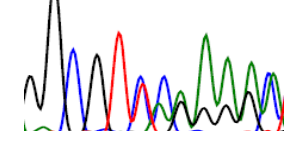

***ELAC2*: Q92frTer9**

**Fig. S2.** Representative images of exome sequencing results. **A.** Integrated view of exome sequencing results presented below subjects ID. Sequence alignments are shown as grey polygons. Variants mismatching the reference sequences indicated by color in the integrated view. Genes and variants are given below aligned sequence reads. Conventional Sanger sequencing was used to confirm exome sequencing results.

## Continuation of Fig. S2.

**R279:**

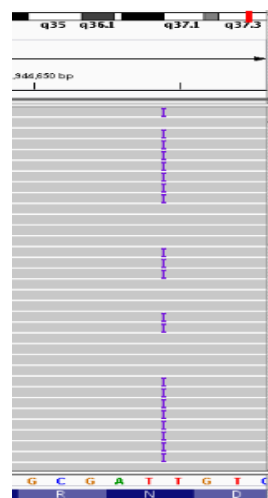

***NDUFA10:***  
N288RfsTer20

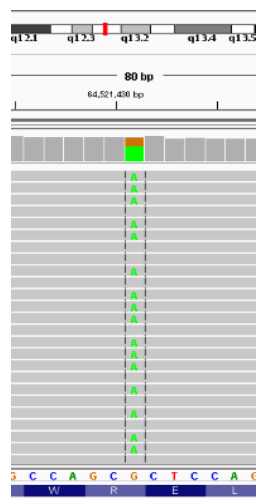

***PYGM:***  
R387C

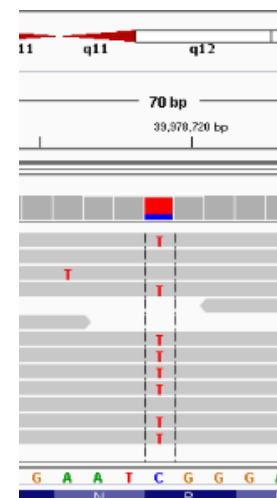

***TIMM50:***  
R342W

**R469:**

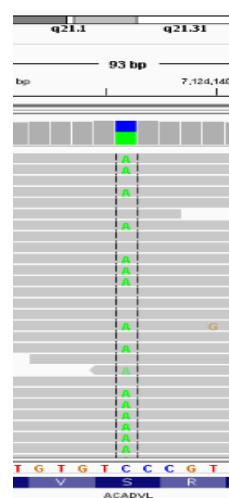

***ACADVL:***  
S110Y

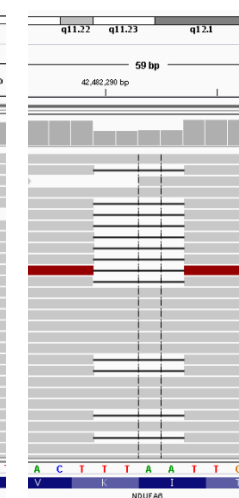

***NDUFA6:***  
I120KfrTer44

**R470:**

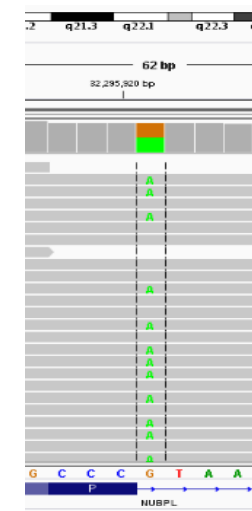

***NUBPL:***  
IVC8DC

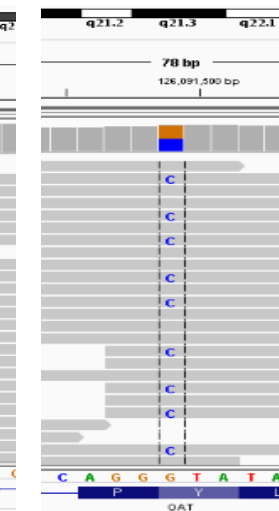

***OAT:***  
Y299Ter

Continuation of Fig. S2.

**R302:**

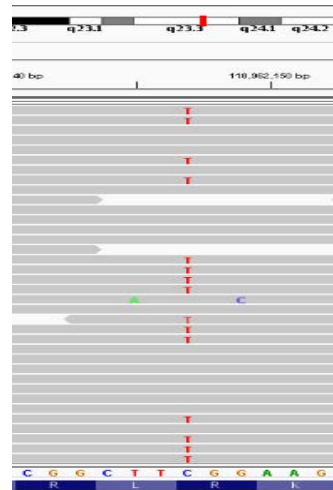

*HMBS*: R175W

**R462:**

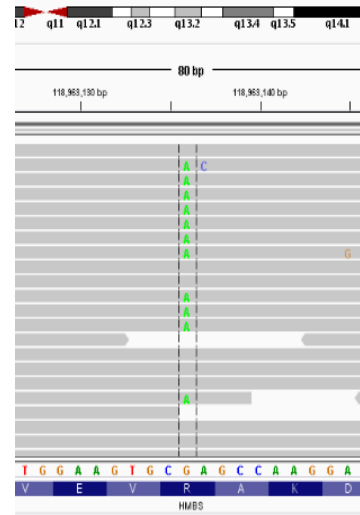

*HMBS*: R229Q

**B.**

**HMBS Protein alignment :**

|            |                                              |
|------------|----------------------------------------------|
| Mutant     | TRL <b>W</b> KLD...VEV <b>Q</b> AKD          |
| Human      | TRL <b>R</b> KLD...VEV <b>R</b> AKD          |
| Dog        | TRL <b>R</b> KLD...VEV <b>R</b> AKD          |
| Rat        | TRL <b>R</b> KLD...VEV <b>R</b> AKD          |
| Mice       | TRL <b>R</b> KLD...VEV <b>R</b> AKD          |
| Zebra fish | TRL <b>R</b> KLD...VEV <b>R</b> ARD          |
| Fruit fly  | TRL <b>A</b> KLD...VE <b>C</b> R <b>A</b> ND |

**B.** Alignment of Hydroxymethylbilane Synthase (*HMBS*) Protein show that *HMBS* variants found in subjects R302 and R462 change residues that are highly conserved between species.
